# Supplementary material for: Hydrogenolysis of carbon–carbon σ-bonds using water catalysed by semi-rigid diiridium(iii) porphyrins
Source: Royal Society of Chemistry journal article supplement (doi:10.1039/c8nj05664a), 2019-01-01

Electronic Supplementary Information

**Hydrogenolysis of carbon-carbon  $\sigma$ -bond using water catalyzed by  
semi-rigid diiridium(III) porphyrins**

Ching Wai Fong<sup>a</sup>, Ho Yin Yu<sup>a</sup>, Claude P. Gros<sup>b</sup> and Kin Shing Chan<sup>\*a</sup>

<sup>a</sup>*Department of Chemistry, The Chinese University of Hong Kong, Shatin, New Territories, Hong Kong SAR, The People's Republic of China. E-mail: ksc@cuhk.edu.hk*

<sup>b</sup>*ICMUB (UMR CNRS 6302), Université de Bourgogne Franche-Comté, 21 000 Dijon, France.*

| <b>Content</b>                                                                                             | <b>Page</b> |
|------------------------------------------------------------------------------------------------------------|-------------|
| General Procedures                                                                                         | S2          |
| Experimental Instrumentation                                                                               | S2          |
| Synthesis of Various Iridium(III) Diporphyrin                                                              | S3          |
| Catalytic Hydrogenation of PCP with Water by Diiridium(III) Porphyrin                                      | S8          |
| <sup>1</sup> H NMR Reaction Progress of the Independent Experiment in the Absence of PCP                   | S9          |
| <sup>1</sup> H NMR and <sup>13</sup> C Spectra                                                             |             |
| <sup>1</sup> H NMR Spectrum of H <sub>2</sub> (ttp-OH)                                                     | S10         |
| <sup>1</sup> H NMR Spectrum of H <sub>4</sub> (dpmx)(ttp)                                                  | S10         |
| <sup>1</sup> H NMR Spectrum of Ir <sup>III</sup> <sub>2</sub> (dpmx)(ttp)(CO) <sub>2</sub> Cl <sub>2</sub> | S11         |
| <sup>1</sup> H NMR Spectrum of Ir <sup>III</sup> <sub>2</sub> (dpmx)(ttp)Me <sub>2</sub>                   | S11         |
| <sup>1</sup> H NMR Spectrum of Ir <sup>III</sup> <sub>2</sub> (dpmx)(ttp) <sup>i</sup> Pr <sub>2</sub>     | S12         |
| <sup>1</sup> H NMR Spectrum of H <sub>4</sub> (dppx)(ttp)                                                  | S12         |
| <sup>1</sup> H NMR Spectrum of Ir <sup>III</sup> <sub>2</sub> (dppx)(ttp)(CO) <sub>2</sub> Cl <sub>2</sub> | S13         |
| <sup>1</sup> H NMR Spectrum of Ir <sup>III</sup> <sub>2</sub> (dppx)(ttp)Me <sub>2</sub>                   | S13         |
| <sup>1</sup> H NMR Spectrum of Ir <sup>III</sup> <sub>2</sub> (dppx)(ttp) <sup>i</sup> Pr <sub>2</sub>     | S14         |
| <sup>13</sup> C NMR Spectrum of Ir <sup>III</sup> <sub>2</sub> (dpmx)(ttp)Me <sub>2</sub>                  | S14         |
| <sup>13</sup> C NMR Spectrum of Ir <sup>III</sup> <sub>2</sub> (dpmx)(ttp) <sup>i</sup> Pr <sub>2</sub>    | S15         |
| <sup>13</sup> C NMR Spectrum of H <sub>4</sub> (dppx)(ttp)                                                 | S15         |

|                                                                                                             |     |
|-------------------------------------------------------------------------------------------------------------|-----|
| $^{13}\text{C}$ NMR Spectrum of $\text{Ir}^{\text{III}}_2(\text{dppx})(\text{ttp})(\text{CO})_2\text{Cl}_2$ | S16 |
| $^{13}\text{C}$ NMR Spectrum of $\text{Ir}^{\text{III}}_2(\text{dppx})(\text{ttp})\text{Me}_2$              | S16 |
| $^{13}\text{C}$ NMR Spectrum of $\text{Ir}^{\text{III}}_2(\text{dppx})(\text{ttp})^i\text{Pr}_2$            | S17 |

## General Procedures

Unless otherwise noted, all reagents were purchased from commercial suppliers and directly used without further purification. Hexane was distilled from anhydrous calcium chloride. Benzene and toluene were distilled from sodium. *N,N*-Dimethylformamide (DMF) was distilled from magnesium sulfate under reduced pressure. Thin layer chromatography was performed on Merck pre-coated silica gel 60 F<sub>254</sub> plates. Silica gel (Merck, 70-230) was used for column chromatography.

All bond activation reactions were carried out inside thick-wall glass tubes equipped with a Rotaflo stopper. The glass tubes were covered by aluminum foil to avoid photochemical reactions. All reactions in 0.5 mL benzene-*d*<sub>6</sub> were carried out in a flame-sealed NMR tube in vacuum with the reaction mixture degassed with three freeze (77 K)-pump (0.005 mmHg)-thaw cycles, then heated in oven in dark and wrapped with aluminum foil to protect from exposure to room light before  $^1\text{H}$  NMR measurements. The NMR yields were with benzene residue as the internal standard. Benzene stock solutions of  $\text{Ir}^{\text{III}}(\text{linker})(\text{ttp})\text{R}_2$  (linker = dpmx or dppx, R = Me or  $^i\text{Pr}$ ) were prepared separately, transferred to the reaction vessel and dried under vacuum at room temperature to obtain anhydrous starting materials. Benzene-*d*<sub>6</sub> stock solution of [2.2]paracyclophane was prepared separately and transferred to the reaction vessel.

## Experimental Instrumentation

$^1\text{H}$  NMR and  $^{13}\text{C}\{^1\text{H}\}$  NMR spectra were recorded on a Bruker DPX-400 spectrometer at 400 MHz and Bruker DPX-400 at 100 MHz or Bruker DPX-700 at 175 MHz respectively. Chemical shifts were referenced to the residual solvent protons in  $\text{C}_6\text{D}_6$  ( $\delta = 7.15$  ppm),  $\text{CDCl}_3$  ( $\delta = 7.26$  ppm) or tetramethylsilane ( $\delta = 0.00$  ppm) in  $^1\text{H}$  NMR spectra and  $\text{CDCl}_3$  ( $\delta = 77.16$  ppm) in  $^{13}\text{C}$  NMR spectra as the internal standards. Chemical shifts ( $\delta$ ) were reported as part per million (ppm) in ( $\delta$ )

scale downfield from TMS. Coupling constants ( $J$ ) were reported in Hertz (Hz).

High resolution mass spectra (HRMS) were recorded on a Bruker Solarix 9.4 Tesla FTICR MS mass spectrometer in electrospray ionization (ESI) mode using chloroform/methanol = 1:1 as solvent or on Bruker Autoflex speed MALDI-TOF instrument using *trans*-2-[3-(4-*tert*-Butylphenyl)-2-methyl-2-propenylidene]malononitrile (DCTB) as the matrix and dichloromethane as the solvent.

### Synthesis of Various Iridium(III) Diporphyrin

**Preparation of 5-(4-hydroxyphenyl)-10,15,20-tritolylporphyrin, H<sub>2</sub>(ttp-OH) (1).** To the refluxing 4-hydroxybenzaldehyde (4.6 g, 37.7 mmol) and 4-tolualdehyde (13.4 mL, 112.9 mmol) in 250 mL propionic acid, pyrrole (10.5 mL, 150.2 mmol) was added slowly. The colourless solution turned to deep purple quickly. The solution was then turned to dark brown in colour after refluxed for 2 h. The reaction mixture was allowed to cool down and crude purple solid was obtained upon suction filtration with several washings with cold methanol. The crude solid was purified by column chromatography on silica gel (70-230 mesh) eluting with CH<sub>2</sub>Cl<sub>2</sub>:hexanes = 2:1. The purple fraction was collected and rotary evaporated to obtain purple solid. Recrystallization from CH<sub>2</sub>Cl<sub>2</sub>/MeOH yields purple solid (1.30 g, 1.98 mmol, 5%). R<sub>f</sub> = 0.12 (CH<sub>2</sub>Cl<sub>2</sub>:hexane = 2:1). <sup>1</sup>H NMR (400 MHz, CDCl<sub>3</sub>): δ -2.78 (s, 2 H), 2.71 (s, 9 H), 7.17 (d,  $J$  = 8.3 Hz, 2 H), 7.55 (d,  $J$  = 7.7 Hz, 6 H), 8.06 (d,  $J$  = 8.3 Hz, 2 H), 8.10 (d,  $J$  = 8.2 Hz, 6 H), 8.85 (s, 8 H). HRMS (MALDI/TOF-MS): Calcd. For (C<sub>47</sub>H<sub>36</sub>N<sub>4</sub>O)<sup>+</sup>: m/z 672.28891. Found m/z 672.3002.

**Preparation of 5,10,15-tritolyl-20-[4-[ $\alpha,\alpha'$ -[*p*-(10,15,20-tritolyl-5-porphyrinyl)-phenoxy]-*m*-xyloxy]phenyl]porphyrin, H<sub>4</sub>(dpmx)(ttp) (2).** A mixture of **1** (541 mg, 0.805 mmol) and  $\alpha,\alpha'$ -dibromo-*m*-xylene (106 mg, 0.402 mmol) was stirred with K<sub>2</sub>CO<sub>3</sub> (1.11 g, 8.03 mmol) in 125 mL DMF at room temperature for 1 d. Solvent was distilled under high vacuum and the crude solid was purified by column chromatography on silica gel (70-230 mesh) eluting with CH<sub>2</sub>Cl<sub>2</sub>:hexanes =

2:1. The dark purple fraction was collected and rotary evaporated to obtain dark purple solid. Recrystallization from CH<sub>2</sub>Cl<sub>2</sub>/MeOH yields dark purple solid (314 mg, 0.217 mmol, 58%). R<sub>f</sub> = 0.55 (CH<sub>2</sub>Cl<sub>2</sub>:hexane = 2:1). <sup>1</sup>H NMR (400 MHz, CDCl<sub>3</sub>): δ -2.76 (s, 4 H), 2.67 (s, 12 H), 2.71 (s, 6 H), 5.47 (s, 4 H), 7.43 (d, *J* = 8.6 Hz, 4 H), 7.51-7.56 (2 d overlap, 12 H), 7.69-7.71 (m, 3 H), 7.92 (s, 1 H), 8.06-8.10 (2 d overlap, 12 H), 8.17 (d, *J* = 8.5 Hz, 4 H), 8.85-8.90 (m, 16 H). HRMS (MALDI/TOF-MS): Calcd. For (C<sub>102</sub>H<sub>78</sub>O<sub>2</sub>N<sub>8</sub>)<sup>+</sup>: m/z 1447.62477. Found m/z 1446.6534.

**Preparation of Ir<sup>III</sup><sub>2</sub>(dpmx)(ttp)(CO)<sub>2</sub>Cl<sub>2</sub> (3).** In a 100 mL round bottom flask with a reflux condenser, a solution of [Ir<sup>I</sup>(cod)Cl]<sub>2</sub> (93 mg, 0.138 mmol) and **2** (51 mg, 0.035 mmol) in 50 mL *p*-xylene was refluxed for 2 d. Solvent was distilled under high vacuum and the crude solid was purified by column chromatography on silica gel (70-230 mesh) eluting with CH<sub>2</sub>Cl<sub>2</sub>:hexanes = 5:1. The red fraction was collected and rotary evaporated to obtain red solid. The major red fraction was collected and rotary evaporated to obtain red solid. Recrystallization from CH<sub>2</sub>Cl<sub>2</sub>/MeOH yields red solid (42 mg, 0.022 mmol, 62%). R<sub>f</sub> = 0.58 (CH<sub>2</sub>Cl<sub>2</sub>:hexanes = 5:1). <sup>1</sup>H NMR (400 MHz, CDCl<sub>3</sub>): δ 2.73 (s, 18 H), 5.49 (s, 4 H), 7.48 (d, *J* = 8.1 Hz, 4 H), 7.61 (d, *J* = 8.1 Hz, 12 H), 7.67-7.74 (m, 3 H), 7.95 (s, 1 H), 8.14 (d, *J* = 7.2 Hz, 6 H), 8.20 (d, *J* = 5.7 Hz, 8 H), 8.27 (d, *J* = 8.2, 2.0 Hz, 2 H), 8.99-9.03 (m, 16 H). HRMS (ESI/FTICR-MS): Calcd. For (C<sub>104</sub>H<sub>74</sub>Cl<sub>2</sub>Ir<sub>2</sub>N<sub>8</sub>O<sub>4</sub> + Na)<sup>+</sup>: m/z 1977.45369. Found m/z 1977.43585.

**Preparation of Ir<sup>III</sup><sub>2</sub>(dpmx)(ttp)Me<sub>2</sub> (4).** A suspension of **3** (47 mg, 0.024 mmol) in 1 mL THF in a Teflon screw head stoppered tube and a solution of NaBH<sub>4</sub> (20 mg, 0.53 mmol) in aqueous NaOH (1 M, 1 mL) in a Schlenk tube were purged with N<sub>2</sub> for 15 min separately. The NaBH<sub>4</sub> solution was added slowly to the suspension of **3** via a cannula. The mixture was heated at 70 °C under N<sub>2</sub> for 2 h to give a brown suspension. The reaction was then cooled to room temperature and iodomethane (6 μL, 0.097 mmol) was added under N<sub>2</sub>. The reaction mixture was further heated at 70 °C for 2 h to give a reddish brown suspension. It was worked up by extraction with CH<sub>2</sub>Cl<sub>2</sub>/H<sub>2</sub>O. The organic

layer was rotary evaporated. The crude solid was purified by column chromatography on silica gel eluting with CH<sub>2</sub>Cl<sub>2</sub>/hexane = 1:1. The major red fraction was collected and dried to give reddish purple solid (33 mg, 0.018 mmol, 73%). R<sub>f</sub> = 0.81 (CH<sub>2</sub>Cl<sub>2</sub>/hexane = 2:1). <sup>1</sup>H NMR (CDCl<sub>3</sub>, 400 MHz) δ -6.29 (s, 6 H), 2.66 (s, 12 H), 2.68 (s, 6 H), 5.42 (s, 4 H), 7.37-7.39 (m, 4 H), 7.49-7.51 (m, 12 H), 7.60-7.62 (m, 1 H), 7.66 (d, *J* = 7.4 Hz, 2 H), 7.87 (s, 1 H), 7.98-8.03 (m, 12 H), 8.07-8.11 (m, 4 H), 8.51-8.56 (m, 16 H). <sup>13</sup>C{<sup>1</sup>H} NMR (CDCl<sub>3</sub>, 175 MHz) δ 21.7, 30.3, 70.3, 113.3, 123.5, 124.0, 127.1, 127.6, 127.6, 129.0, 129.1, 131.1, 131.3, 131.4, 131.4, 132.3, 133.7, 133.9, 134.6, 134.9, 135.1, 137.3, 137.6, 138.8, 143.4, 143.5, 158.5. HRMS (ESI/FTICR-MS) calcd. for (C<sub>104</sub>H<sub>80</sub>Ir<sub>2</sub>N<sub>8</sub>O<sub>2</sub> + Na)<sup>+</sup>: m/z 1881.55741. Found: m/z 188155625.

**Preparation of Ir<sup>III</sup><sub>2</sub>(dpmx)(ttp)<sup>i</sup>Pr<sub>2</sub> (5).** A suspension of **3** (49 mg, 0.025 mmol) in 1 mL THF in a Teflon screw head stoppered tube and a solution of NaBH<sub>4</sub> (20 mg, 0.53 mmol) in aqueous NaOH (1 M, 1 mL) in a Schlenk tube were purged with N<sub>2</sub> for 15 min separately. The NaBH<sub>4</sub> solution was added slowly to the suspension of **3** via a cannula. The mixture was heated at 70 °C under N<sub>2</sub> for 2 h to give a brown suspension. The reaction was then cooled to room temperature and 2-iodopropane (10 μL, 0.10 mmol) was added under N<sub>2</sub>. The reaction mixture was further heated at 70 °C for 2 h to give a reddish brown suspension. It was worked up by extraction with CH<sub>2</sub>Cl<sub>2</sub>/H<sub>2</sub>O. The organic layer was rotary evaporated. The crude solid was purified by column chromatography on silica gel eluting with CH<sub>2</sub>Cl<sub>2</sub>/hexane = 1:1. The major red fraction was collected and dried to give reddish purple solid (30 mg, 0.016 mmol, 63%). R<sub>f</sub> = 0.77 (CH<sub>2</sub>Cl<sub>2</sub>/hexane = 1:1). δ -5.07 (septet, 2 H), -4.43 (d, 12 H), 2.70 (s, 18 H), 5.42 (s, 4 H), 7.35-7.38 (m, 4 H), 7.48-7.53 (m, 12 H), 7.58 (s, 1 H), 7.61-7.63 (d, 2 H), 7.83 (s, 1 H), 7.98 (d, 6 H), 8.03 (d, 6 H), 8.09 (d, 2 H), 8.48-8.54 (m, 16 H). <sup>13</sup>C{<sup>1</sup>H} NMR (CDCl<sub>3</sub>, 175 MHz) δ -3.0, 21.5, 21.7, 70.3, 113.2, 113.5, 124.4, 124.8, 124.8, 127.2, 127.6, 127.6, 129.2, 131.3, 131.4, 131.4, 131.5, 133.5, 133.6, 133.9, 134.0, 134.6, 134.7, 135.1, 137.3, 137.6, 138.8, 143.7, 143.7, 143.8, 158.5.

**Preparation of 5,10,15-tritoyl-20-[4-[ $\alpha,\alpha'$ -[*p*-(10,15,20-tritoyl-5-porphyrinyl)-phenoxy]**

**-*p*-xyloxy]phenyl]porphyrin, H<sub>4</sub>(dppx)(ttp) (6).** A mixture of **1** (200 mg, 0.297 mmol) and  $\alpha,\alpha'$ -dibromo-*m*-xylene (40 mg, 0.150 mmol) was stirred with K<sub>2</sub>CO<sub>3</sub> (0.500 g, 3.62 mmol) in 20 mL DMF at room temperature for 3 d. Solvent was distilled under high vacuum and the crude solid was purified by column chromatography on silica gel (70-230 mesh) eluting with chloroform. The dark purple fraction was collected and rotary evaporated to obtain dark purple solid. Recrystallization from CH<sub>2</sub>Cl<sub>2</sub>/MeOH yields dark purple solid (138.6 mg, 0.0957 mmol, 64%). R<sub>f</sub> = 0.34 (CH<sub>2</sub>Cl<sub>2</sub>:hexanes = 2:1). <sup>1</sup>H NMR (400 MHz, CDCl<sub>3</sub>):  $\delta$  -2.76 (s, 4 H), 2.70 (s, 9 H), 2.71 (s, 9 H), 5.45 (s, 4 H), 7.41 (d, *J* = 8.5 Hz, 4 H), 7.54-7.57 (m, 12 H), 7.78 (s, 4 H), 8.08-8.10 (2 d overlap, 12 H), 8.16 (d, *J* = 8.5 Hz, 4 H), 8.85-8.90 (m, 16 H). <sup>13</sup>C{<sup>1</sup>H} NMR (CDCl<sub>3</sub>, 100 MHz)  $\delta$  21.7, 70.3, 113.2, 113.8, 119.8, 120.2, 127.5, 128.3, 129.6, 131.3, 134.7, 135.0, 135.2, 135.8, 137.2, 137.5, 139.4, 158.7. HRMS (MALDI/TOF-MS): Calcd. For (C<sub>102</sub>H<sub>78</sub>O<sub>2</sub>N<sub>8</sub>)<sup>+</sup>: m/z 1447.62477. Found m/z 1446.7447.

**Preparation of Ir<sup>III</sup><sub>2</sub>(dppx)(ttp)(CO)<sub>2</sub>Cl<sub>2</sub> (7).** In a 100 mL round bottom flask with a reflux condenser, a solution of [Ir<sup>I</sup>(cod)Cl]<sub>2</sub> (121 mg, 0.180 mmol) and **6** (65 mg, 0.045 mmol) in 50 mL *p*-xylene was refluxed for 2 d. After Solvent was distilled off under high vacuum, the solid was purified by column chromatography on silica gel (70-230 mesh) eluting with CHCl<sub>3</sub>:hexanes = 5:1. The major red fraction was collected and rotary evaporated to obtain red solid. Recrystallization from CH<sub>2</sub>Cl<sub>2</sub>/MeOH gave red solid (57 mg, 0.029 mmol, 65%). R<sub>f</sub> = 0.24 (CHCl<sub>3</sub>:hexanes = 5:1). <sup>1</sup>H NMR (400 MHz, CDCl<sub>3</sub>):  $\delta$  2.69 (s, 9 H), 2.71 (s, 9 H), 5.44 (d, *J* = 9.9 Hz, 4 H), 7.38 (d, *J* = 8.5 Hz, 2 H), 7.43 (d, *J* = 8.6 Hz, 2 H), 7.51-7.53 (m, 6 H), 7.58 (d, *J* = 7.7 Hz, 6 H), 7.77-7.79 (m, 4 H), 8.02 (s, 6 H), 8.10 (d, *J* = 8.2 Hz, 4 H), 8.16 (d, *J* = 7.7 Hz, 4 H), 8.22 (d, *J* = 7.7 Hz, 2 H), 8.47-8.50 (m, 8 H), 8.94-8.99 (m, 8 H). <sup>13</sup>C{<sup>1</sup>H} NMR (175 MHz, CDCl<sub>3</sub>):  $\delta$  21.7, 70.2, 113.3, 133.5, 121.8, 122.2, 123.7, 124.1, 127.6, 127.8, 128.0, 128.3, 128.9, 131.4, 131.9, 132.0, 133.4, 133.8, 134.0, 134.3, 134.5, 135.0, 135.5, 135.7, 137.0, 137.2, 137.8, 138.3, 138.8, 138.9, 141.2, 141.4, 143.3,

158.9.

**Preparation of Ir<sup>III</sup><sub>2</sub>(dppx)(ttp)Me<sub>2</sub> (8).** A suspension of **7** (21 mg, 0.011 mmol) in 1 mL THF in a Teflon screw head stoppered tube and a solution of NaBH<sub>4</sub> (8.3 mg, 0.22 mmol) in aqueous NaOH (1 M, 1 mL) in a Schlenk tube were purged with N<sub>2</sub> for 15 min separately. The NaBH<sub>4</sub> solution was added slowly to the suspension of **7** via a cannula. The mixture was heated at 70 °C under N<sub>2</sub> for 2 h to give a brown suspension. The reaction was then cooled to room temperature and iodomethane (3 μL, 0.043 mmol) was added under N<sub>2</sub>. The reaction mixture was further heated at 70 °C for 2 h to give a reddish brown suspension. It was worked up by extraction with CHCl<sub>3</sub>/H<sub>2</sub>O. The organic layer was rotary evaporated. The crude solid was purified by column chromatography on silica gel eluting with CHCl<sub>3</sub>/hexane = 2:1. The major red fraction was collected and dried to give reddish purple solid (10 mg, 0.0054 mmol, 50%). R<sub>f</sub> = 0.75 (CH<sub>2</sub>Cl<sub>2</sub>/hexane = 2:1). <sup>1</sup>H NMR (CDCl<sub>3</sub>, 400 MHz) δ -6.28 (s, 6 H), 2.68 (s, 18 H), 5.41 (s, 4 H), 7.37 (d, *J* = 8.4 Hz, 4 H), 7.52 (d, *J* = 7.3 Hz, 12 H), 7.75 (s, 4 H), 7.99-8.04 (m, 14 H), 8.06-8.07 (m, 2 H), 8.52-8.55 (m, 16 H). <sup>13</sup>C{<sup>1</sup>H} NMR (175 MHz, CDCl<sub>3</sub>): δ 21.7, 30.4, 70.1, 113.1, 113.2, 123.5, 124.0, 127.6, 127.6, 128.3, 131.4, 133.7, 133.9, 134.5, 134.8, 135.0, 137.0, 137.3, 138.8, 143.3, 143.5, 158.5. HRMS (ESI/FTICR-MS): Calcd. For (C<sub>104</sub>H<sub>80</sub>Ir<sub>2</sub>N<sub>8</sub>O<sub>2</sub>)<sup>+</sup>: m/z 1858.56764. Found m/z 1858.57146.

**Preparation of Ir<sup>III</sup><sub>2</sub>(dppx)(ttp)<sup>i</sup>Pr<sub>2</sub> (9).** A suspension of **7** (21 mg, 0.011 mmol) in 1 mL THF in a Teflon screw head stoppered tube and a solution of NaBH<sub>4</sub> (8.3 mg, 0.22 mmol) in aqueous NaOH (1 M, 1 mL) in a Schlenk tube were purged with N<sub>2</sub> for 15 min separately. The NaBH<sub>4</sub> solution was added slowly to the suspension of **7** via a cannula. The mixture was heated at 70 °C under N<sub>2</sub> for 2 h to give a brown suspension. The reaction was then cooled to room temperature and 2-iodopropane (4 μL, 0.43 mmol) was added under N<sub>2</sub>. The reaction mixture was further heated at 70 °C for 2 h to give a reddish brown suspension. It was worked up by extraction with CHCl<sub>3</sub>/H<sub>2</sub>O. The organic layer was rotary evaporated. The crude solid was purified by column chromatography on silica gel eluting with

CHCl<sub>3</sub>/hexane = 2:1. The major red fraction was collected and dried to give reddish purple solid (12 mg, 0.0061 mmol, 56%). R<sub>f</sub> = 0.76 (CH<sub>2</sub>Cl<sub>2</sub>/hexane = 2:1). <sup>1</sup>H NMR (CDCl<sub>3</sub>, 400 MHz) δ -5.07 (septet, 2 H), -4.43 (d, *J* = 6.5 Hz, 12 H), 2.70 (s, 18 H), 5.42 (s, 4 H), 7.37-7.40 (m, 4 H), 7.52-7.55 (m, 12 H), 7.74-7.75 (m, 4 H), 8.01 (d, *J* = 6.8 Hz, 6 H), 8.05 (d, *J* = 6.5 Hz, 8 H), 8.11 (d, *J* = 7.7 Hz, 2 H), 8.51-8.58 (m, 16 H). <sup>13</sup>C {<sup>1</sup>H} NMR (175 MHz, CDCl<sub>3</sub>): δ -3.0, 21.5, 21.7, 70.1, 113.1, 113.1, 124.3, 124.7, 124.8, 127.6, 127.6, 128.2, 131.4, 131.4, 131.4, 133.5, 134.0, 134.5, 134.6, 135.1, 137.0, 137.3, 138.8, 143.6, 143.8, 158.4. HRMS (ESI/FTICR-MS): Calcd. For (C<sub>104</sub>H<sub>80</sub>Ir<sub>2</sub>N<sub>8</sub>O<sub>2</sub>)<sup>+</sup>: *m/z* 1914.63033. Found *m/z* 1914.63138.

### Catalytic Hydrogenation of PCP with Water by Iridium(III) Diporphyrin

**With Ir<sup>III</sup><sub>2</sub>(dpmx)(ttp)Me<sub>2</sub>.** Ir<sup>III</sup><sub>2</sub>(dpmx)(ttp)Me<sub>2</sub> (0.45 mg, 0.00024 mmol), H<sub>2</sub>O (8.6 μL, 0.48 mmol) and benzene-*d*<sub>6</sub> stock solution (500 μL) of PCP (1.0 mg, 0.0048 mmol) were added successively to a NMR tube. The orange mixture was degassed for three freeze-pump-thaw cycles and the NMR tube was flame-sealed under vacuum. It was heated at 200 °C in the dark for 40 h. It was monitored with <sup>1</sup>H NMR spectroscopy at particular time intervals and the NMR yields were taken. 4,4'-Dimethylbibenzyl **11** was formed in 27% yield. Some precipitate was observed at the bottom of the sealed tube.

**With Ir<sup>III</sup><sub>2</sub>(dpmx)(ttp)<sup>i</sup>Pr<sub>2</sub>.** Ir<sup>III</sup><sub>2</sub>(dpmx)(ttp)<sup>i</sup>Pr<sub>2</sub> (0.46 mg, 0.00024 mmol), H<sub>2</sub>O (8.6 μL, 0.48 mmol) and benzene-*d*<sub>6</sub> stock solution (500 μL) of PCP (1.0 mg, 0.0048 mmol) were added successively to a NMR tube. The orange mixture was degassed for three freeze-pump-thaw cycles and the NMR tube was flame-sealed under vacuum. It was heated at 200 °C in the dark for 40 h. It was monitored with <sup>1</sup>H NMR spectroscopy at particular time intervals and the NMR yields were taken. 4,4'-Dimethylbibenzyl **11** was formed in 40% yield. Some precipitate was observed at the bottom of the sealed tube.



**With Ir<sup>III</sup><sub>2</sub>(dppx)(ttp)Me<sub>2</sub>.** Ir<sup>III</sup><sub>2</sub>(dppx)(ttp)Me<sub>2</sub> (0.45 mg, 0.00024 mmol), H<sub>2</sub>O (8.6 μL, 0.48 mmol) and benzene-*d*<sub>6</sub> stock solution (500 μL) of PCP (1.0 mg, 0.0048 mmol) were added successively to a NMR tube. The orange mixture was degassed for three freeze-pump-thaw cycles and the NMR tube was flame-sealed under vacuum. It was heated at 200 °C in the dark for 40.5 h. It was monitored with <sup>1</sup>H NMR spectroscopy at particular time intervals and the NMR yields were taken. 4,4'-Dimethylbibenzyl **11** was formed in 59% yield. Some precipitate was observed at the bottom of the sealed tube.

**With Ir<sup>III</sup><sub>2</sub>(dppx)(ttp)<sup>i</sup>Pr<sub>2</sub>.** Ir<sup>III</sup><sub>2</sub>(dpmx)(ttp)<sup>i</sup>Pr<sub>2</sub> (0.46 mg, 0.00024 mmol), H<sub>2</sub>O (8.6 μL, 0.48 mmol) and benzene-*d*<sub>6</sub> stock solution (500 μL) of PCP (1.0 mg, 0.0048 mmol) were added successively to a NMR tube. The orange mixture was degassed for three freeze-pump-thaw cycles and the NMR tube was flame-sealed under vacuum. It was heated at 200 °C in the dark for 31.5 h. It was monitored with <sup>1</sup>H NMR spectroscopy at particular time intervals and the NMR yields were taken. 4,4'-Dimethylbibenzyl **11** was formed in 66% yield. Some precipitate was observed at the bottom of the sealed tube.

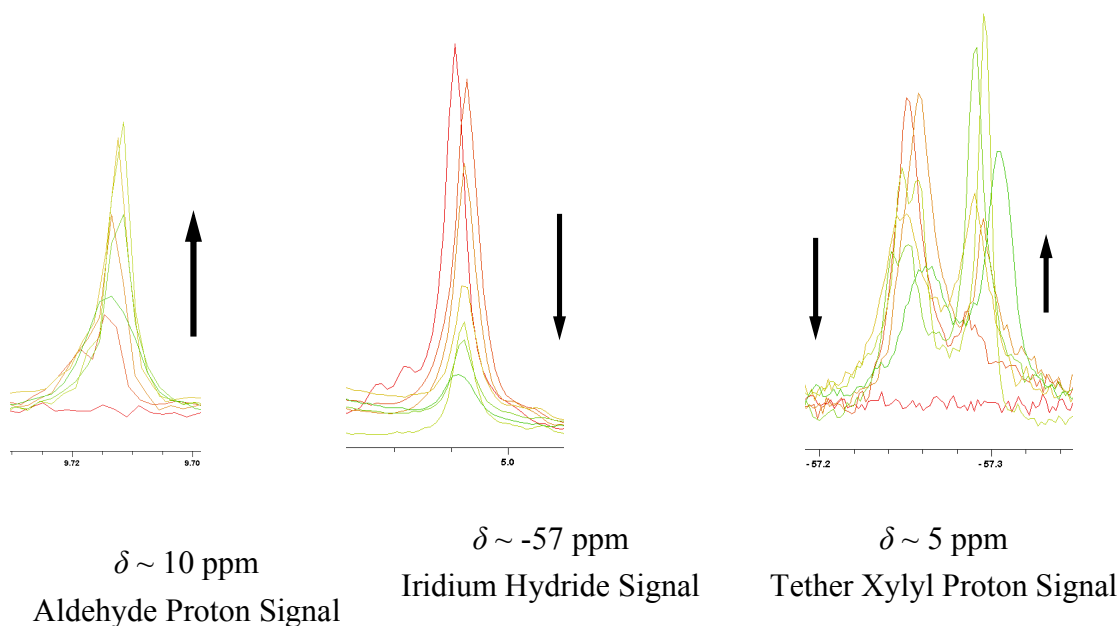

**<sup>1</sup>H NMR Reaction Progress of the Independent Experiment in the Absence of PCP**

# $^1\text{H}$ NMR and $^{13}\text{C}$ Spectra

## $^1\text{H}$ NMR Spectrum of $\text{H}_2(\text{tp-OH})$

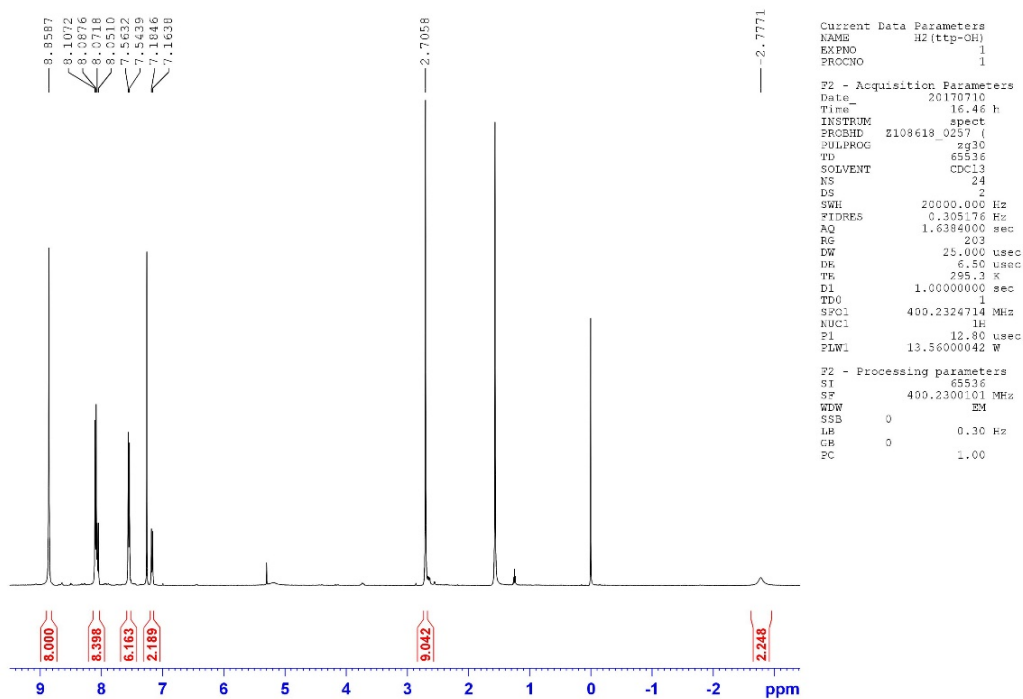

## $^1\text{H}$ NMR Spectrum of $\text{H}_4(\text{dpmx})(\text{tp})$

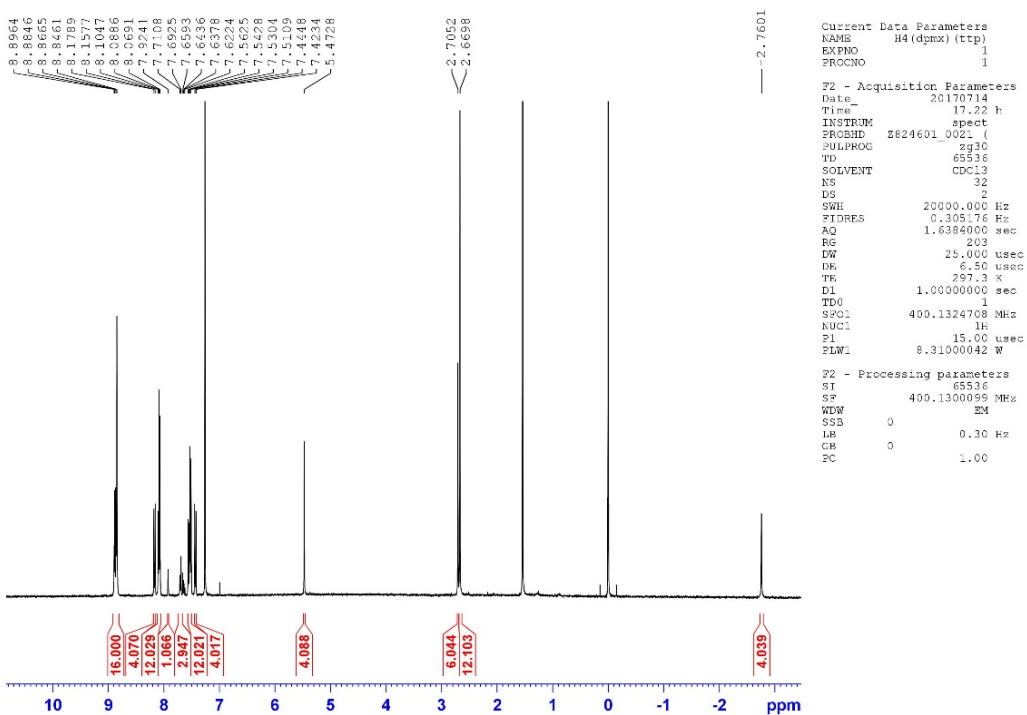

# $^1\text{H}$ NMR Spectrum of $\text{Ir}^{\text{III}}_2(\text{dpmx})(\text{ttp})(\text{CO})_2\text{Cl}_2$

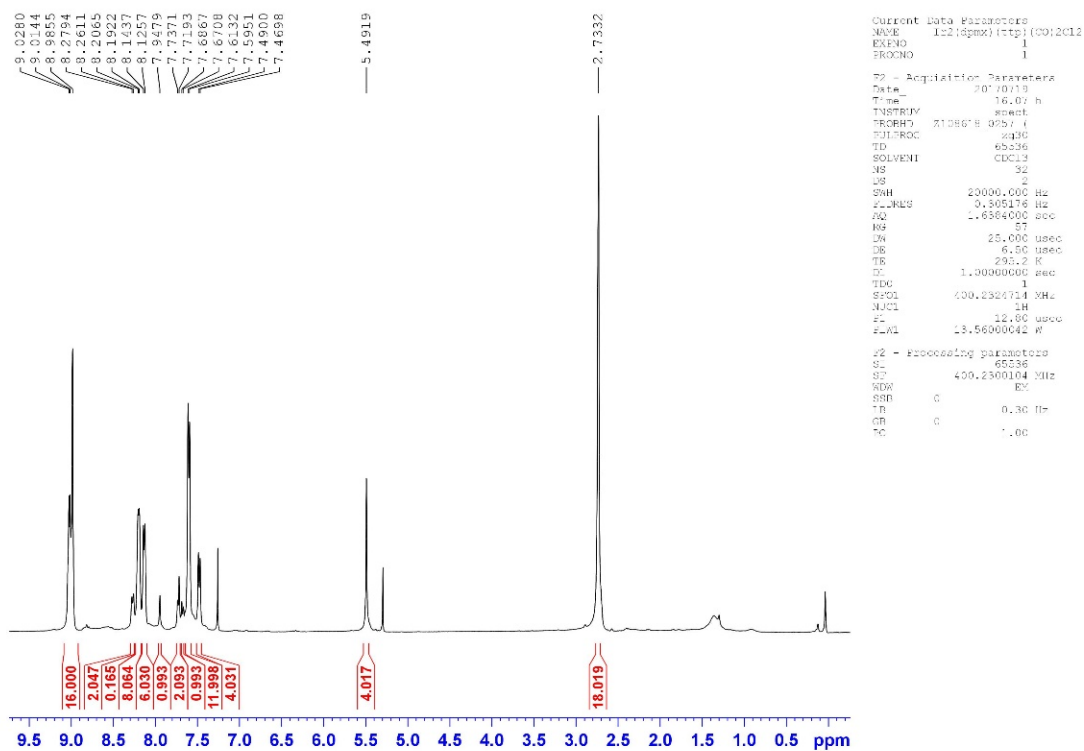

# $^1\text{H}$ NMR Spectrum of $\text{Ir}^{\text{III}}_2(\text{dpmx})(\text{ttp})\text{Me}_2$

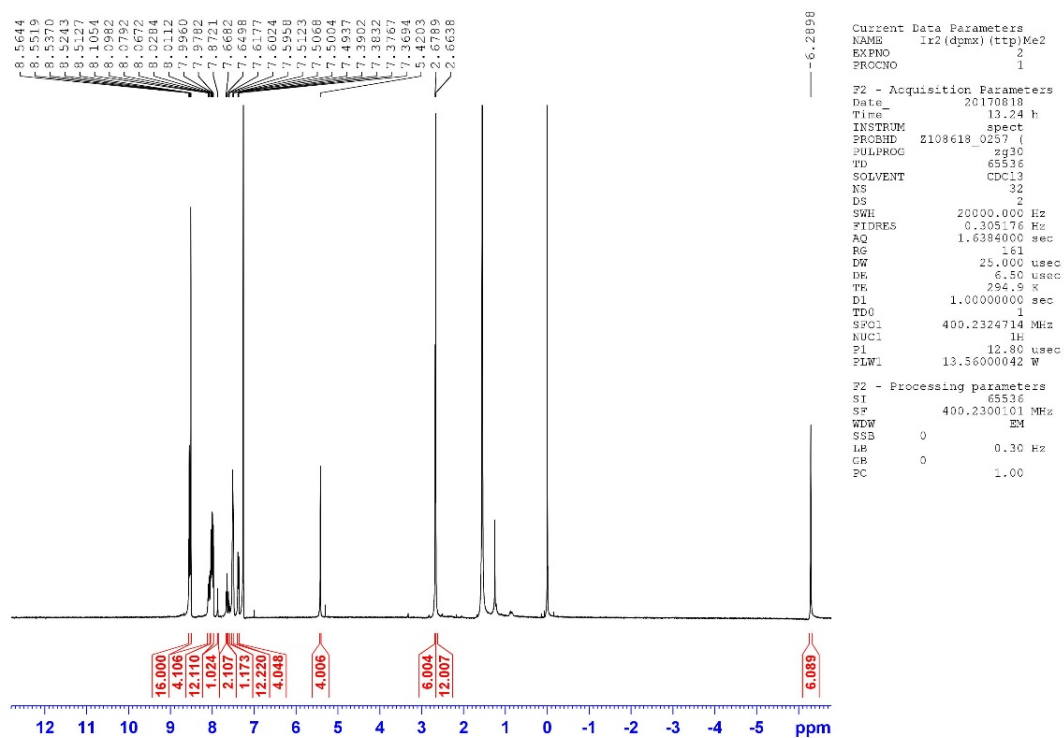

# $^1\text{H}$ NMR Spectrum of $\text{Ir}^{\text{III}}_2(\text{dpmx})(\text{ttp})\text{Pr}_2$

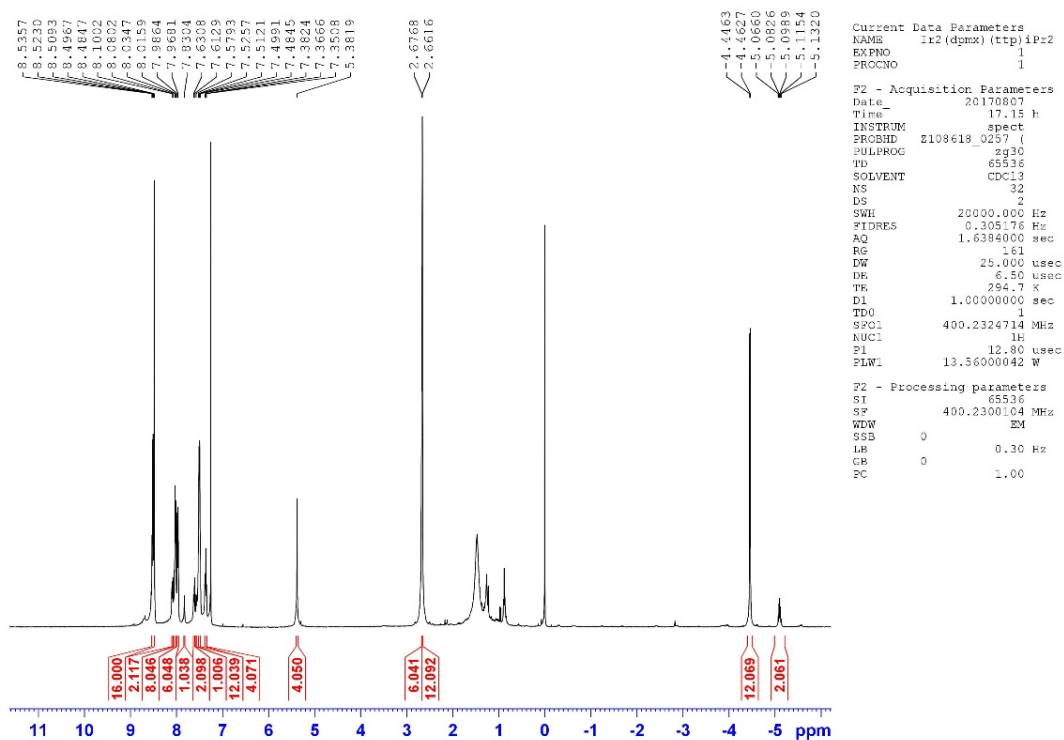

# $^1\text{H}$ NMR Spectrum of $\text{H}_4(\text{dppx})(\text{ttp})$

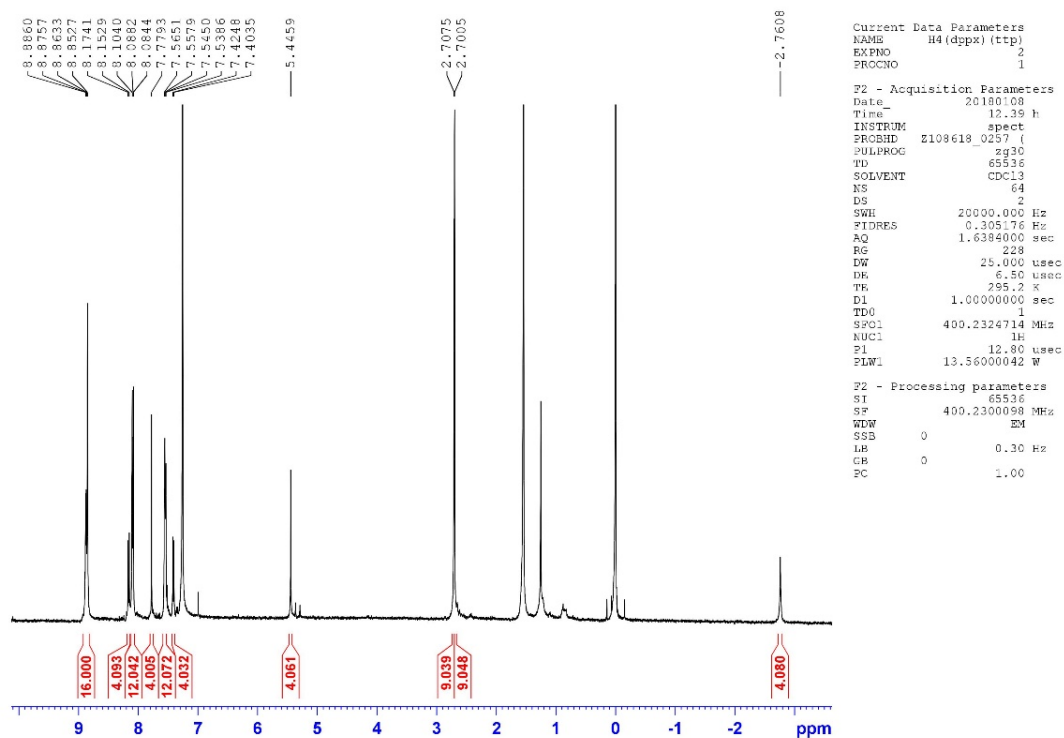

# $^1\text{H}$ NMR Spectrum of $\text{Ir}^{\text{III}}_2(\text{dppx})(\text{ttp})(\text{CO})_2\text{Cl}_2$

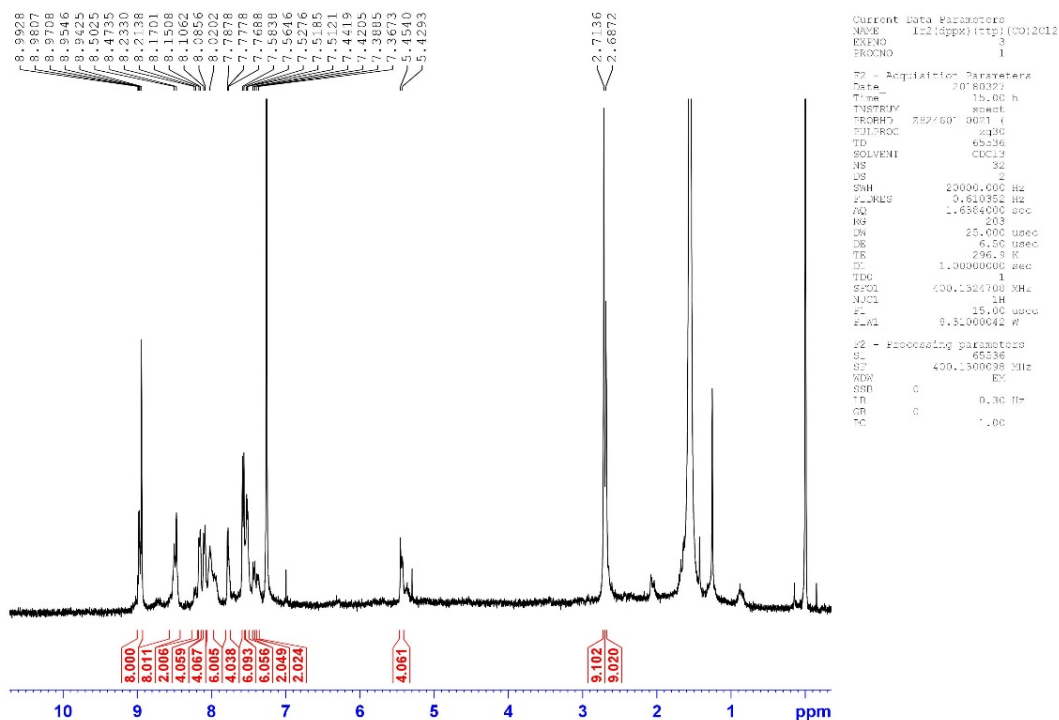

# $^1\text{H}$ NMR Spectrum of $\text{Ir}^{\text{III}}_2(\text{dppx})(\text{ttp})\text{Me}_2$

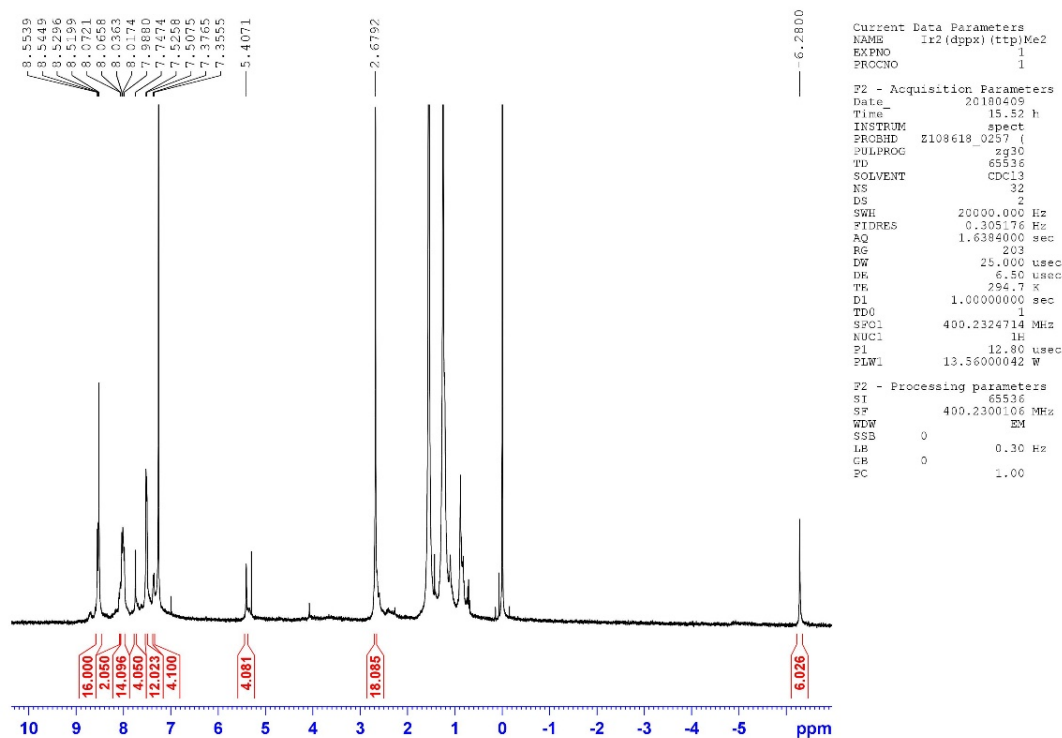

# $^1\text{H}$ NMR Spectrum of $\text{Ir}^{\text{III}}_2(\text{dppx})(\text{ttp})\text{Pr}_2$

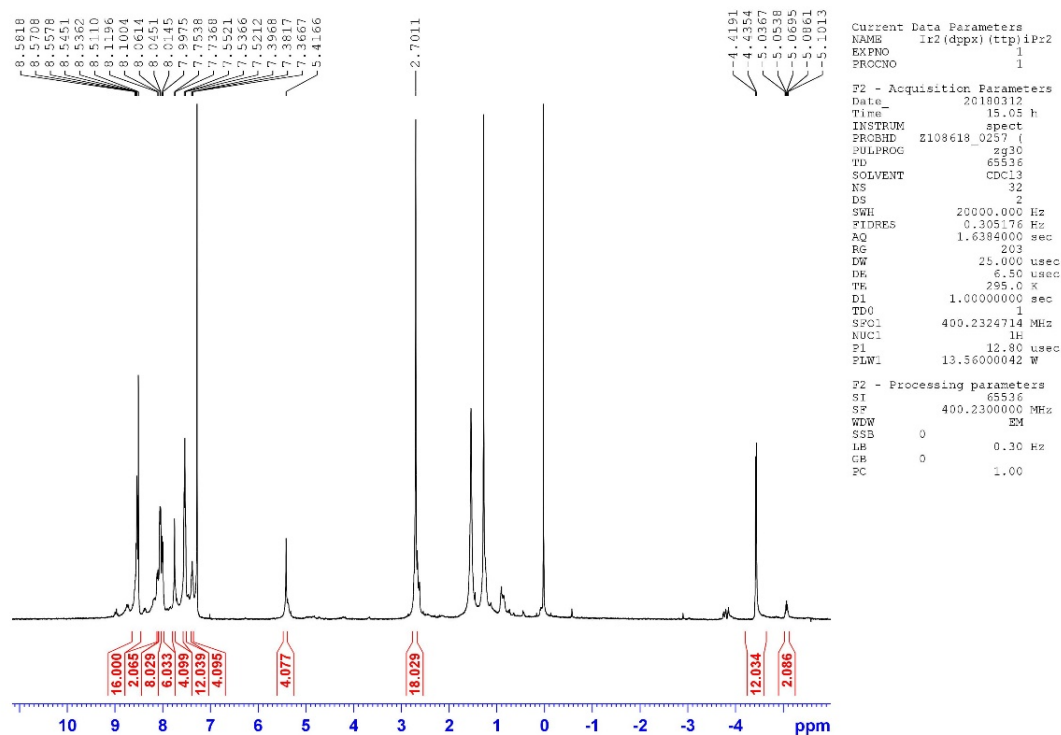

# $^{13}\text{C}$ NMR Spectrum of $\text{Ir}^{\text{III}}_2(\text{dpmx})(\text{ttp})\text{Me}_2$

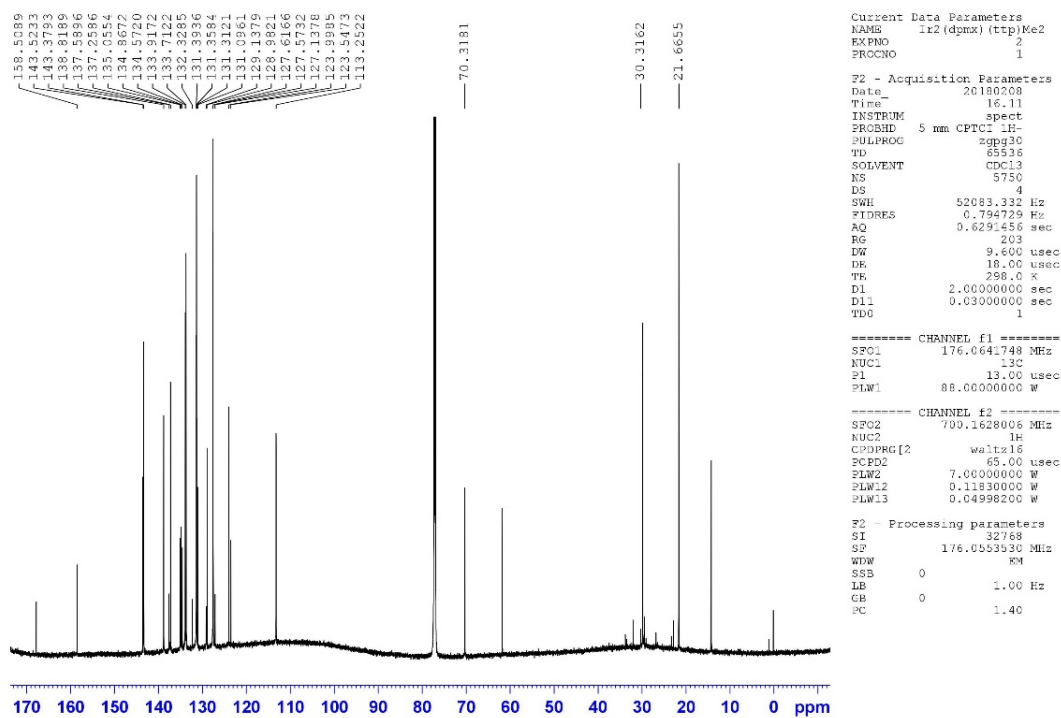

$^{13}\text{C}$  NMR Spectrum of  $\text{Ir}^{\text{III}}_2(\text{dpmx})(\text{ttp})^i\text{Pr}_2$

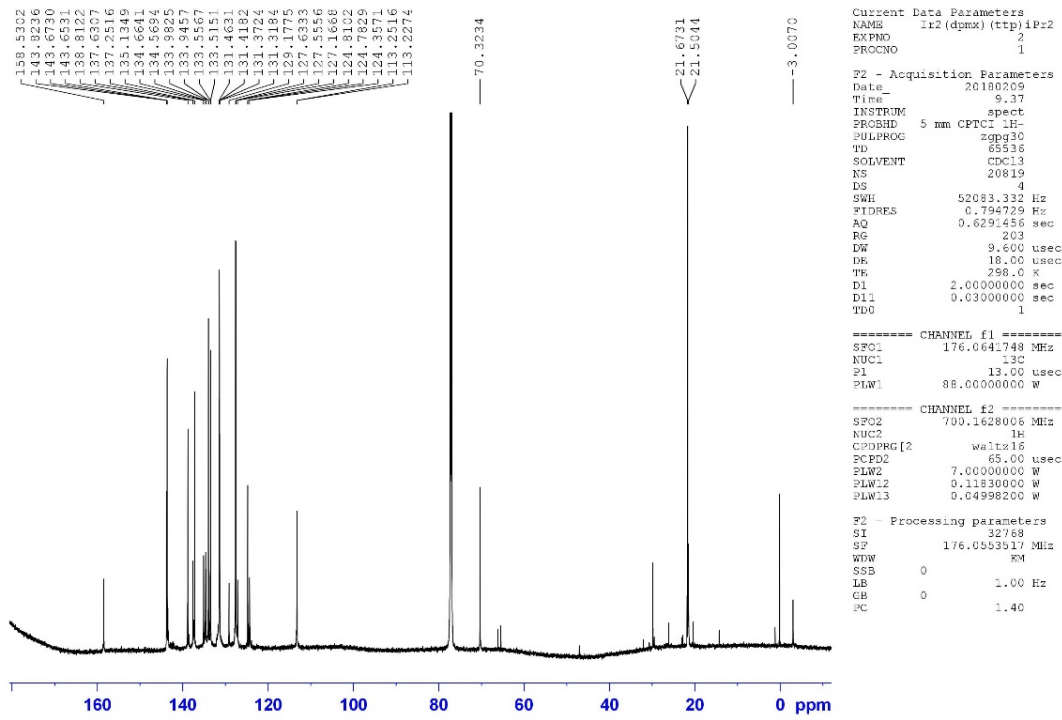

$^{13}\text{C}$  NMR Spectrum of  $\text{H}_4(\text{dppx})(\text{ttp})$

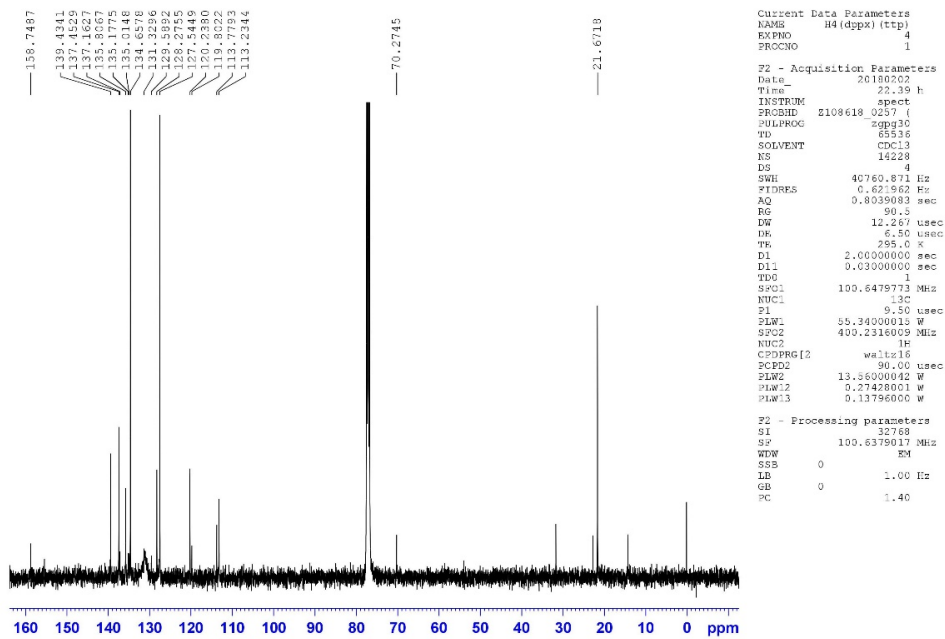

$^{13}\text{C}$  NMR Spectrum of  $\text{Ir}^{\text{III}}_2(\text{dppx})(\text{ttp})(\text{CO})_2\text{Cl}_2$

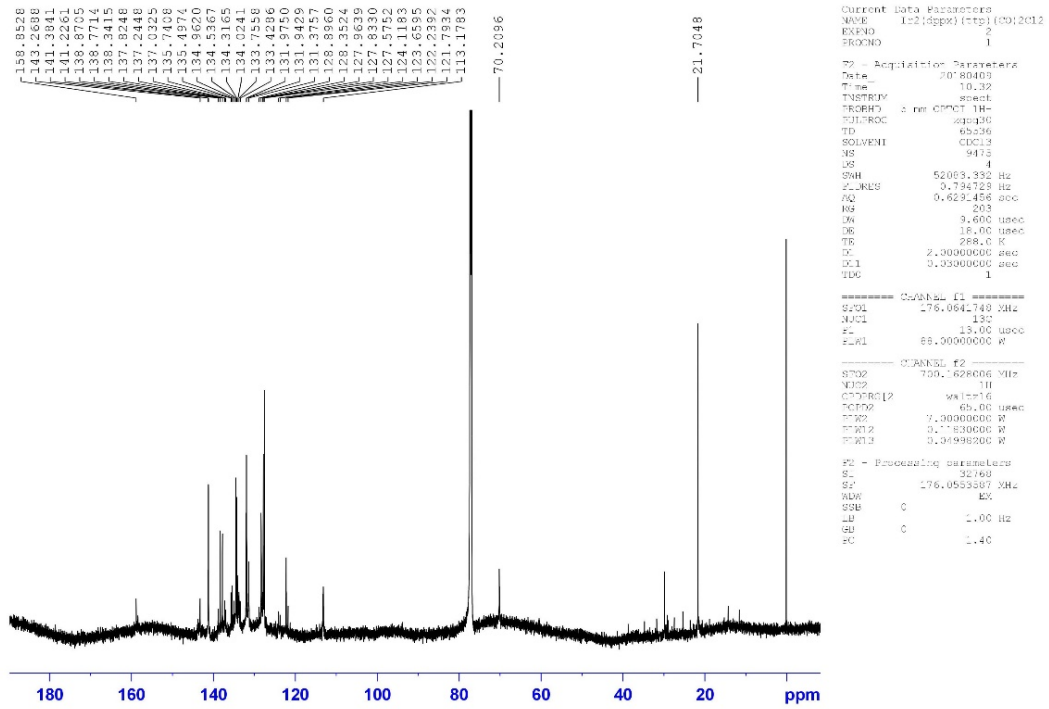

$^{13}\text{C}$  NMR Spectrum of  $\text{Ir}^{\text{III}}_2(\text{dppx})(\text{ttp})\text{Me}_2$

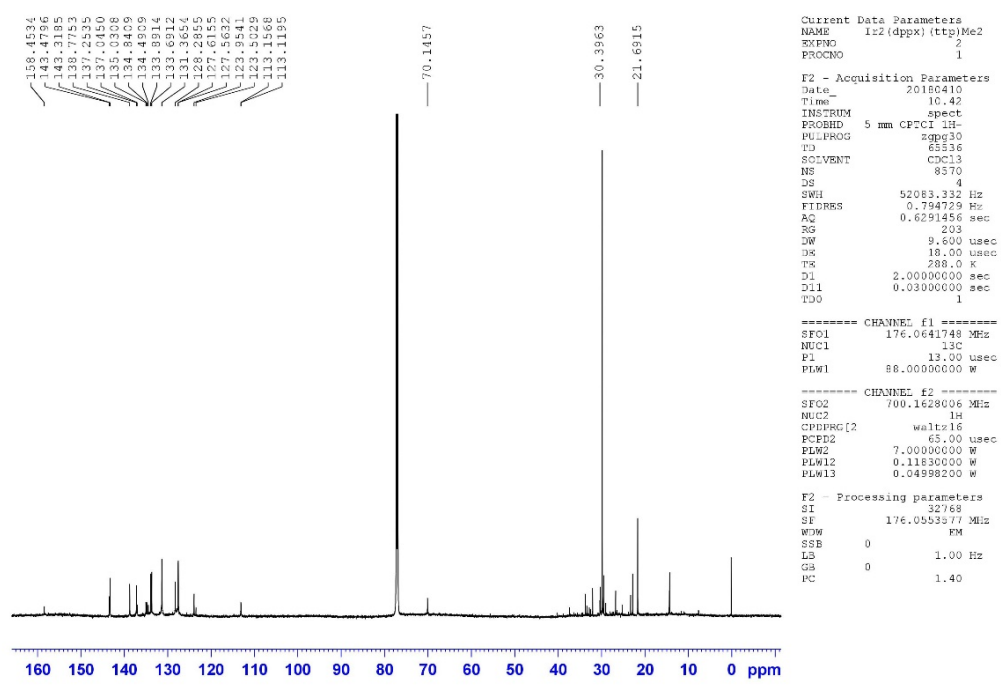



$^{13}\text{C}$  NMR Spectrum of  $\text{Ir}^{\text{III}}_2(\text{dppx})(\text{ttp})\text{iPr}_2$

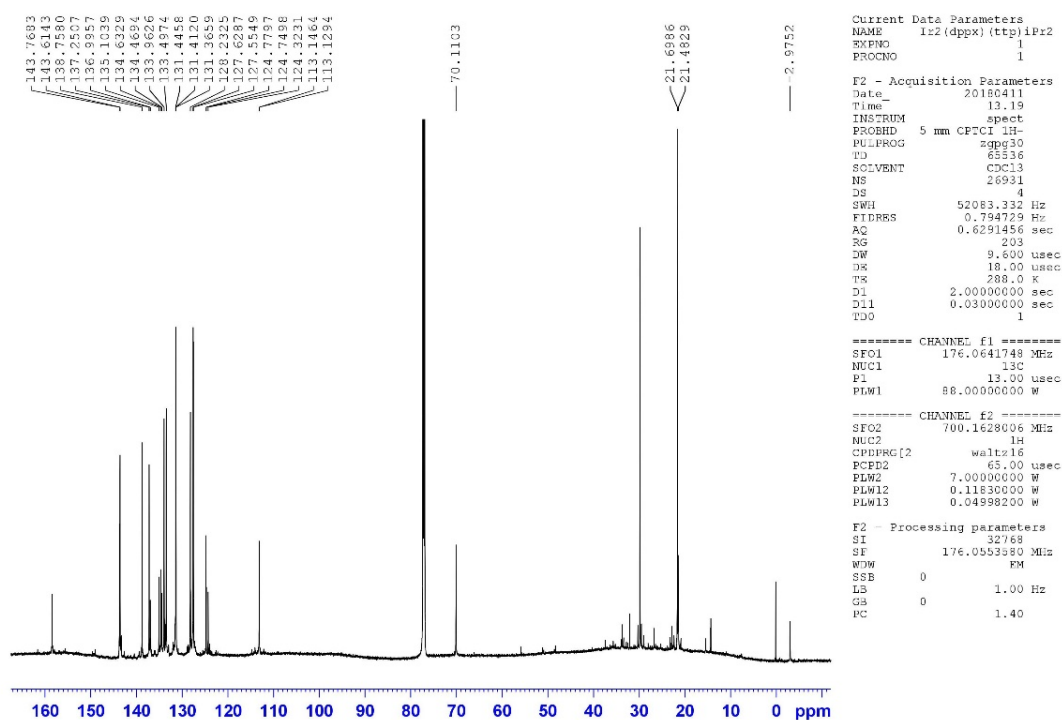

Supplement: c8nj05664a1.pdf [file c8nj05664a1.pdf]
